# Supplementary material for: Insight into the reversible behavior of Lewis–Brønsted basic poly(ionic liquid)s in one-pot two-step chemical fixation of CO2 to linear carbonates
Source: Royal Society of Chemistry journal article supplement (doi:10.1039/d1gc02539b), 2021-01-01
Supplement: d1gc02539b1.pdf [file d1gc02539b1.pdf]

## Supporting Information

For

### **Insight into the reversible behavior of Lewis-Brønsted basic poly(ionic liquid)s in one-pot two-step chemical fixation of CO<sub>2</sub> to linear carbonate**

*Yuting He<sup>a</sup>, Huimin Lu<sup>a</sup>, Xue Li<sup>a</sup>, Jun Wu<sup>a</sup>, Tiancheng Pu<sup>c</sup>, Wei Du<sup>a</sup>, Hongping Li<sup>b</sup>, Jing Ding<sup>\*a</sup>, Hui Wan<sup>a</sup>, Guofeng Guan<sup>\*a</sup>*

<sup>a</sup> State Key Laboratory of Materials-Oriented Chemical Engineering, College of Chemical Engineering, Jiangsu National Synergetic Innovation Center for Advanced Materials, Nanjing Tech University, Nanjing 210009, PR China.

<sup>b</sup> Institute for Energy Research of Jiangsu University, Jiangsu University, Jiangsu 212013, PR China.

<sup>c</sup> State Key Laboratory of Chemical Engineering, East China University of Science and Technology, Shanghai 200237, PR China.

\* Corresponding authors

E-mails: [jding@njtech.edu.cn](mailto:jding@njtech.edu.cn) (Jing Ding)

[guangf@njtech.edu.cn](mailto:guangf@njtech.edu.cn) (Guofeng Guan)

Tel: +86 25 83587198, Fax: +86 25 83587198

## Catalyst characterization

$^1\text{H}$  NMR spectra and  $^{13}\text{C}$  NMR spectra were performed on a Bruker DPX 500 spectrometer at ambient temperature by using  $\text{D}_2\text{O}$  as the deuterium reagent. Fourier transform infrared (FT-IR) spectra were determined on a Thermo Nicolet 6700 spectrometer in the wavenumber range of  $4000\text{-}500\text{ cm}^{-1}$  of fully dried samples mixed with KBr. X-ray photoelectron spectroscopy (XPS) was conducted on a PHI 5000 Versa Probe X-ray photoelectron spectrometer equipped with Al  $\text{K}\alpha$  radiation (1486.6 eV) as the X-ray source. The C 1s peak at 284.5 eV was used as the reference for the binding energies. Brunauer-Emmett-Teller (BET) surface areas, pore volumes and pore-size distributions of the samples were calculated from nitrogen adsorption–desorption isotherms acquired on a BELSORP-MINI instrument at 77 K. Scanning electron microscopy (SEM) images were investigated on a Regulus 8220 scanning electron microscope (10 kV). Thermal gravimetric (TG) analysis experiments were carried out with a STA409 instrument under the  $\text{N}_2$  flow at a heating rate of  $10\text{ K}\cdot\text{min}^{-1}$ . An FT-IR spectrometer (PerkinElmer Frontier) equipped with an *in situ* diffuse reflection cell (Harrick Praying Mantis) was used for *in situ* DRIFTS analysis.

## Computational details

Density functional theory (DFT) calculations based on quantum mechanics were carried out with Gaussian 09 suite of programs. The geometric optimization of the structures and frequency analysis were carried out by using the B3LYP functional with the 6-311++G\*\* basis set with empirical dispersion. Non-covalent interaction (NCI) and electrostatic potential (ESP) [1] were analyzed by Multiwfn 3.8 (wave function analysis) [2] and VMD 1.9.2 (molecular visualization) [3], respectively.

### Synthesis of amino-derived ILs monomer [VBTEDA]Cl

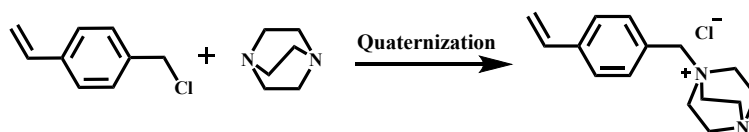

### Synthesis of carboxyl-derived ILs monomer [CEVIm]Cl

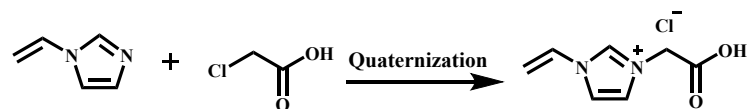

**Scheme S1.** Synthetic procedure of functionalized ILs monomer.

#### Synthesis of carboxyl-derived PILs

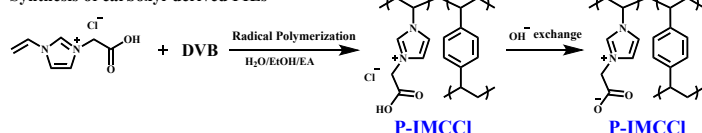

#### Synthesis of amino-derived PILs

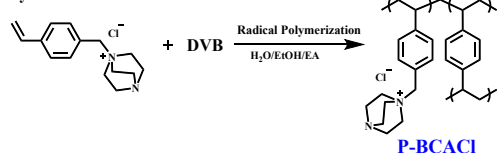

#### Synthesis of bifunction-derived basic PILs

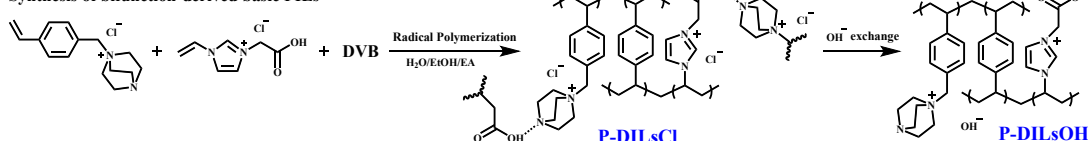

**Scheme S2.** Synthetic procedure of functionalized PILs.

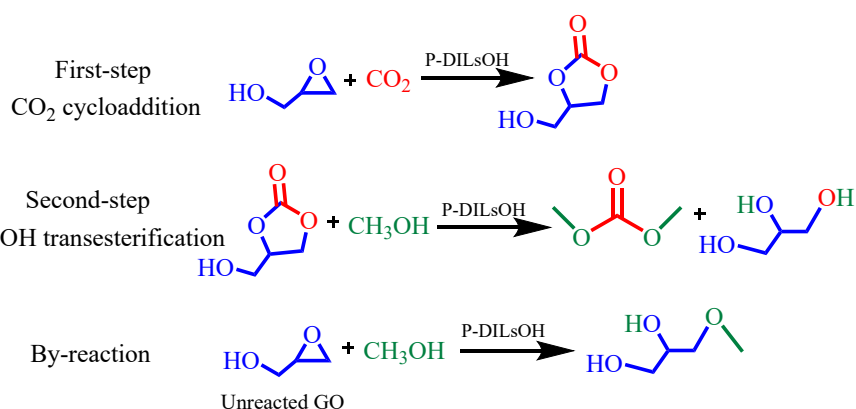

**Scheme S3.** Catalytic procedure of two-step synthesis method.

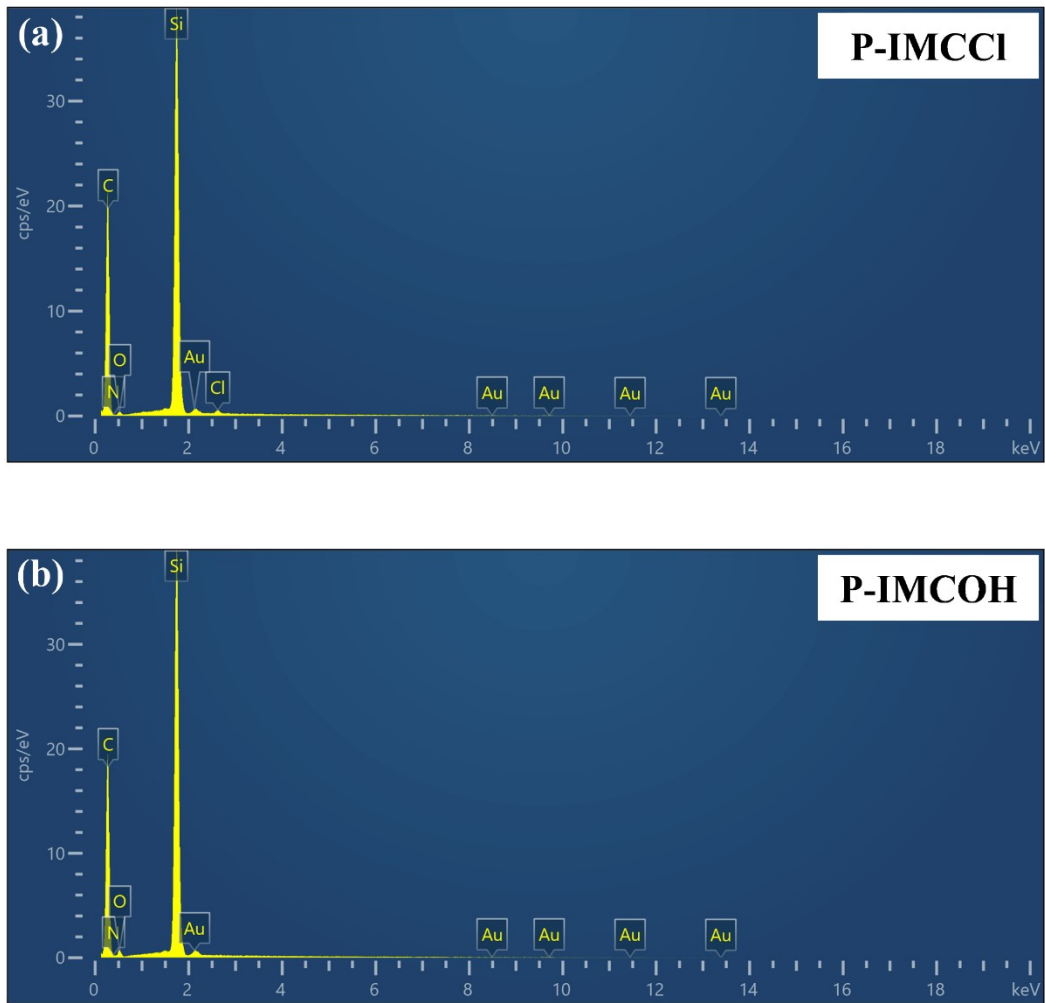

**Fig. S1.** EDS spectra of (a) P-IMCCl and (b) P-IMC (the sample was coated on polished silicon wafers and sprayed with gold for 90 s).

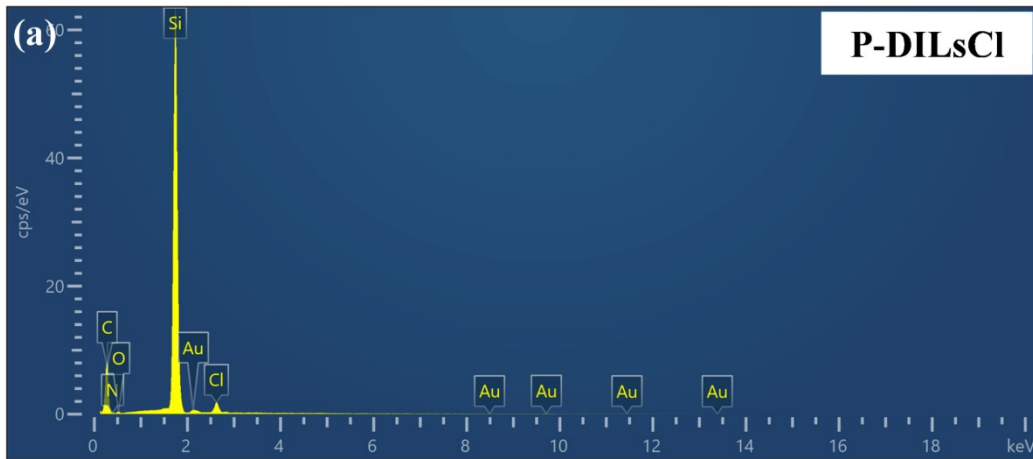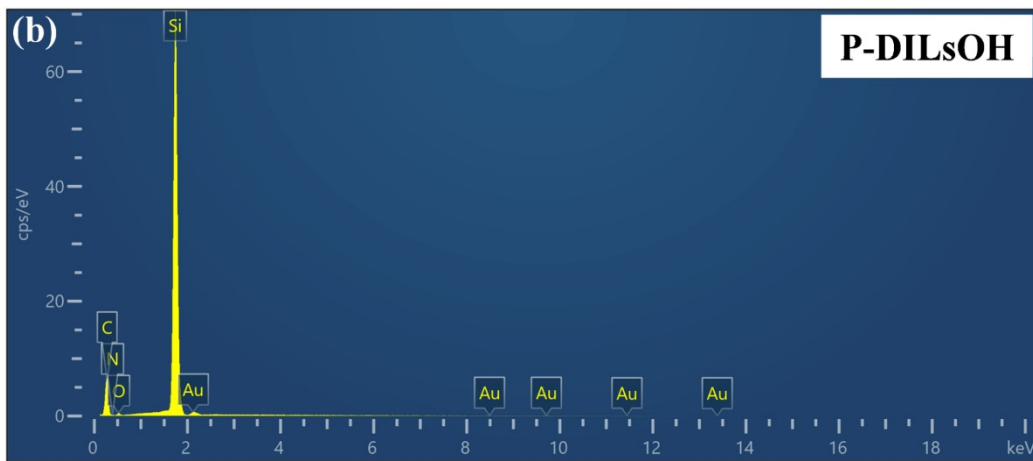

**Fig. S2.** EDS spectra of (a) P-DILsCl and (b) DILsOH (the sample was coated on polished silicon wafers and sprayed with gold for 90 s).

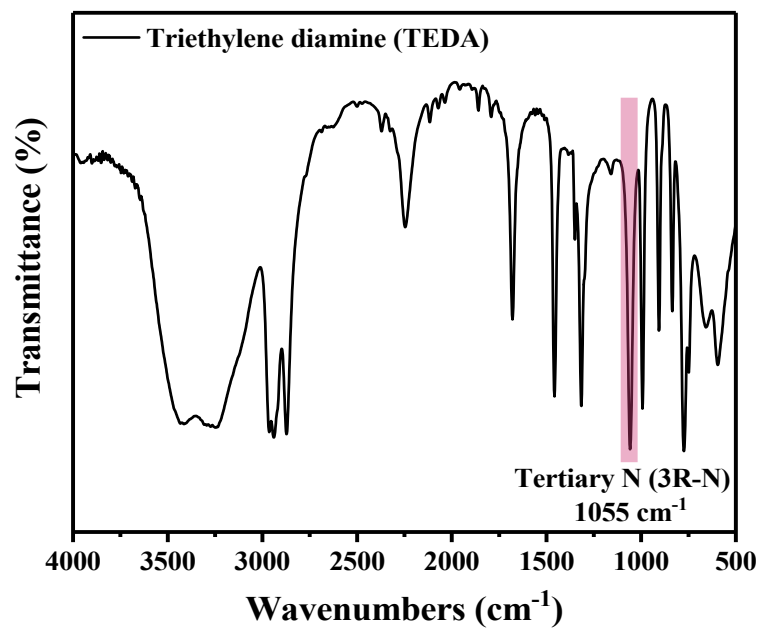

**Fig. S3.** FT-IR spectra of Triethylene diamine.

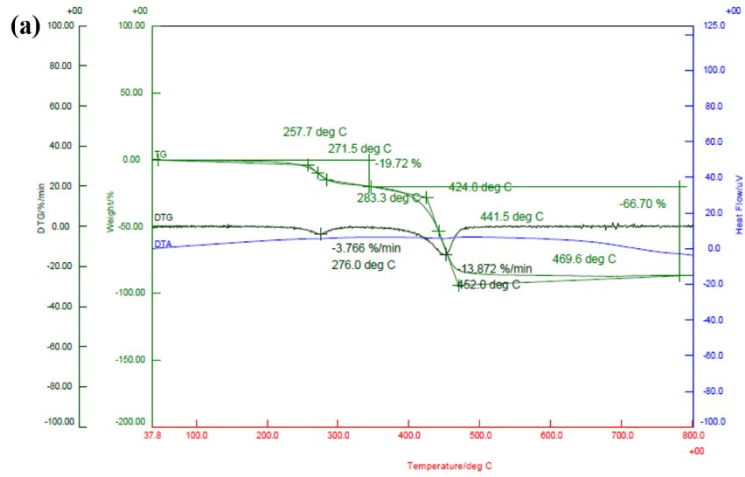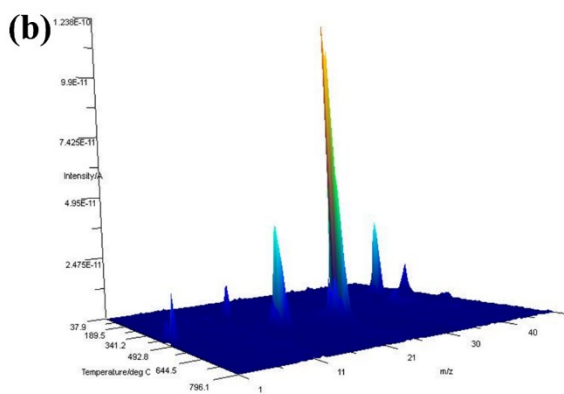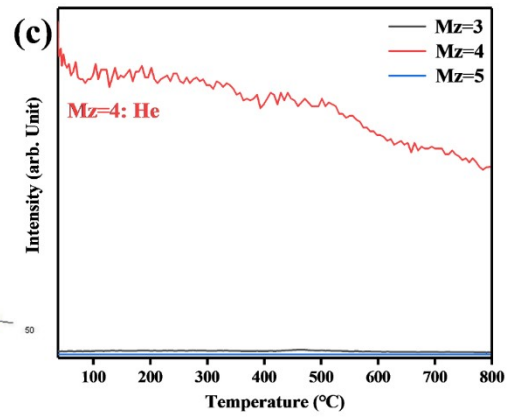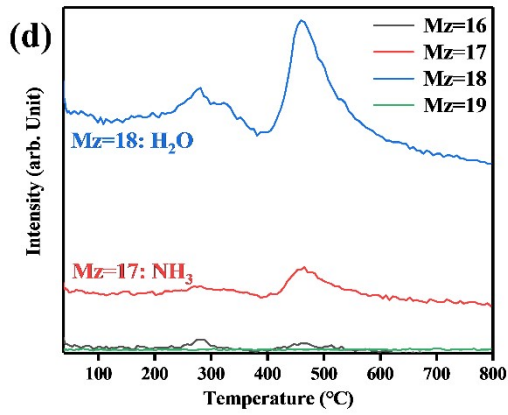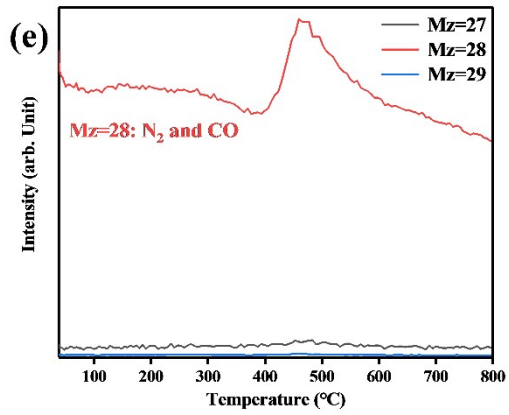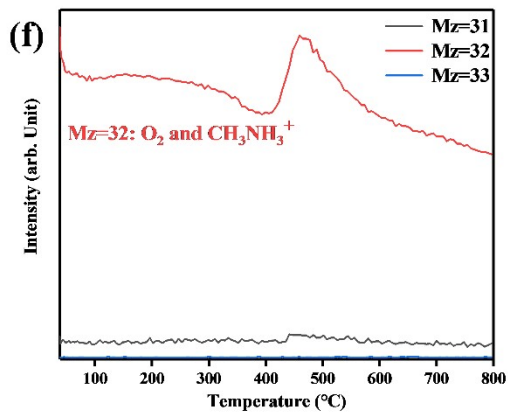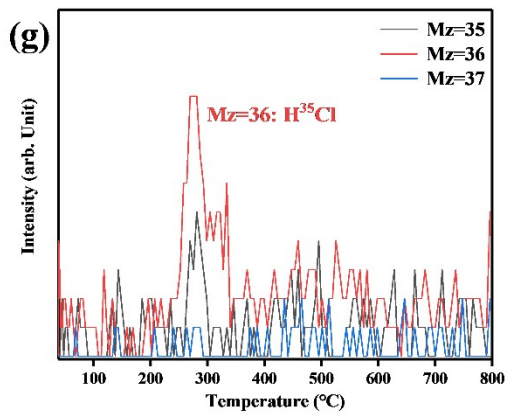

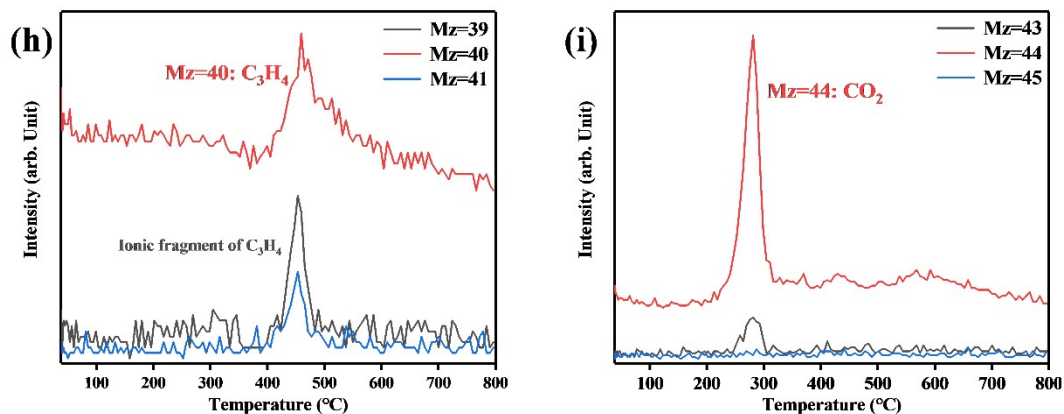

**Fig. S4.** TG-Mass result of P-DILsCl. (a) TG, DTG and DTA curves of P-DILsCl. (b) Relationship between molecular weight of P-DILsCl pyrolysis products and signal intensity with pyrolysis temperature. (c-i) Relationship between different molecular weight pyrolysis products of signal intensity with pyrolysis temperature.



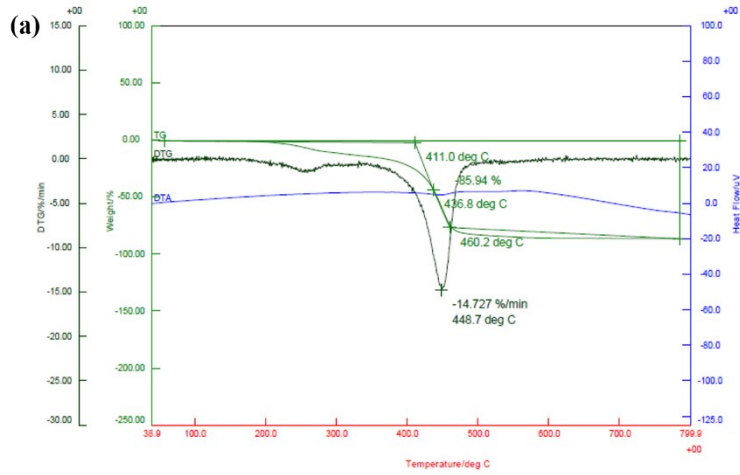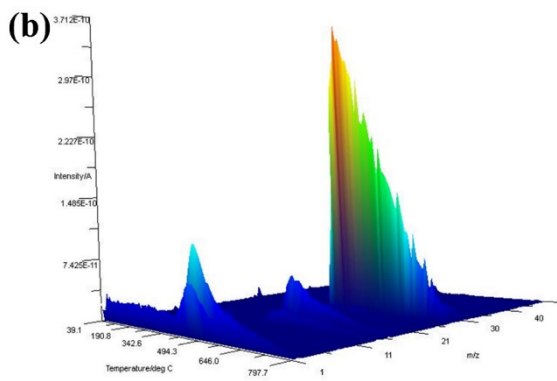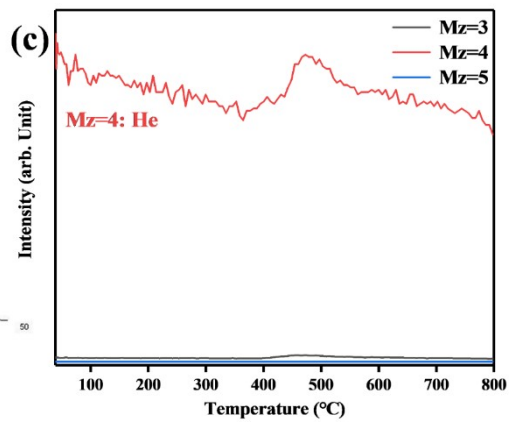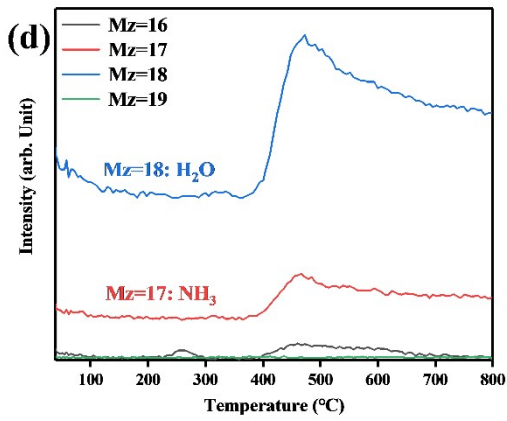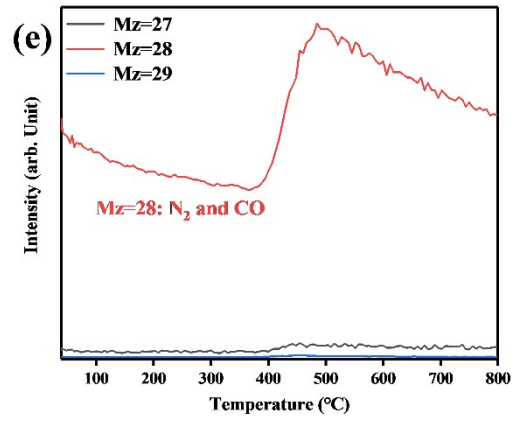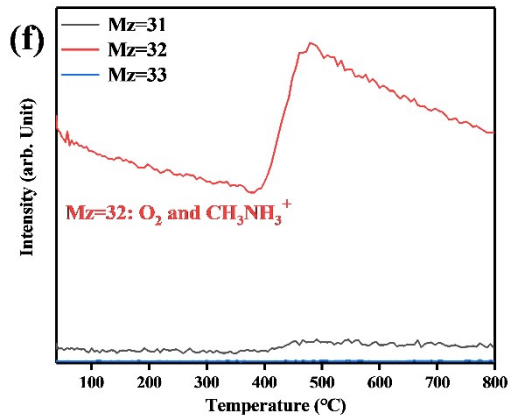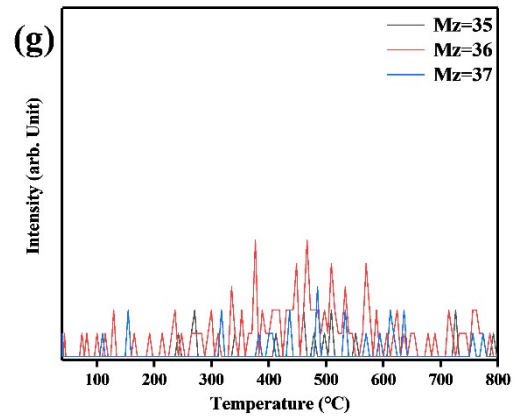

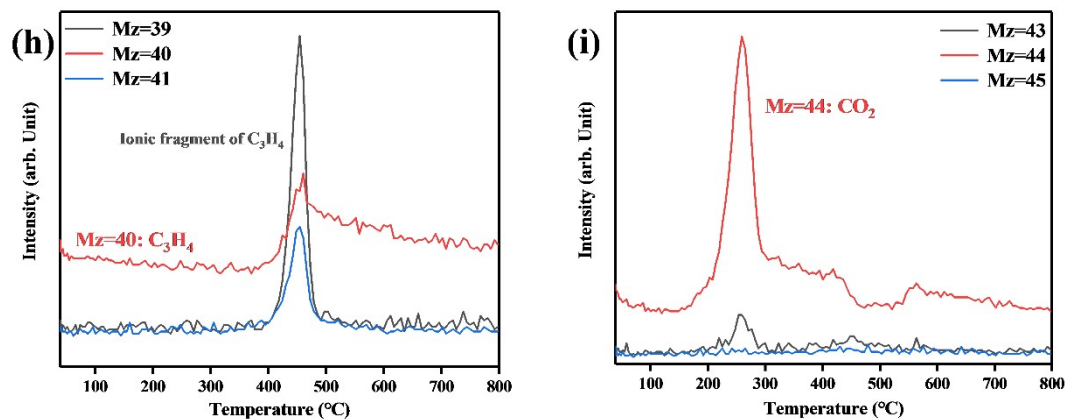

**Fig. S5.** TG-Mass result of P-DILsOH. (a) TG, DTG and DTA curves of P-DILsOH. (b) Relationship between molecular weight of P-DILsCl pyrolysis products and signal intensity with pyrolysis temperature. (c-i) Relationship between different molecular weight pyrolysis products of signal intensity with pyrolysis temperature.

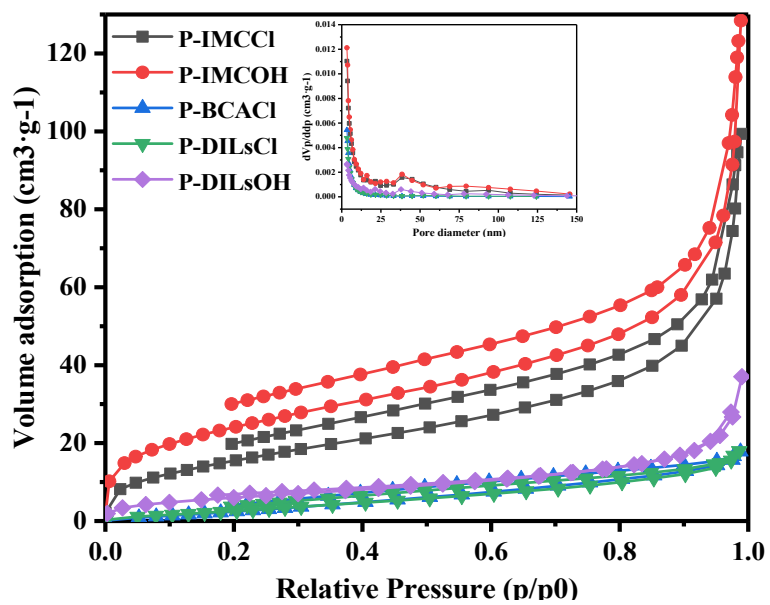

**Fig. S6.** N<sub>2</sub> sorption isotherms and pore size distribution curves.

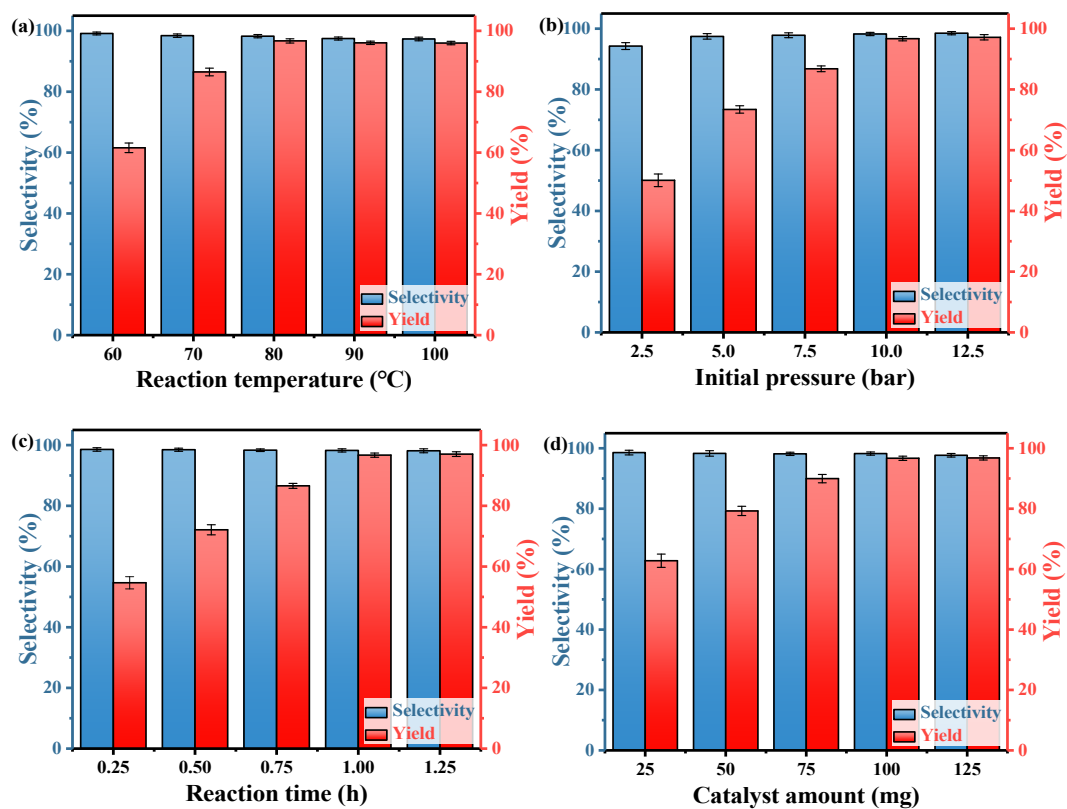

**Fig. S7.** Dependencies of GLC yields on different parameters over P-DILsOH in CO<sub>2</sub> cycloaddition. (a) the effect of reaction temperature (conditions: 10 bar CO<sub>2</sub>, 1.0 h, 100 mg catalyst). (b) the effect of CO<sub>2</sub> pressure (conditions: 80 °C, 1.0 h, 100 mg catalyst). (c) the effect of reaction time (conditions: 80 °C, 10 bar CO<sub>2</sub>, 100 mg catalyst). (d) the effect of catalyst amount (conditions: 80 °C, 10 bar CO<sub>2</sub>, 1 h).

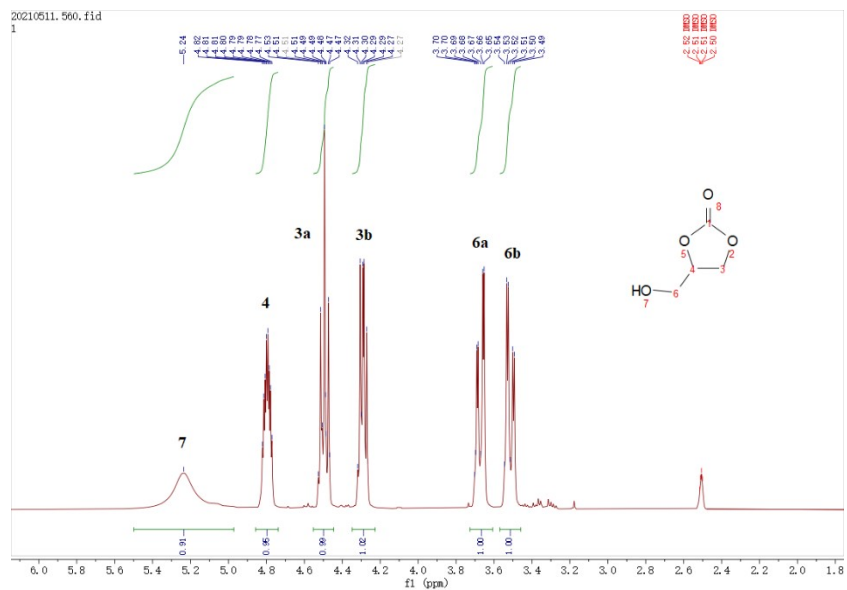

**Fig. S8.**  $^1\text{H}$  NMR of products after the cycloaddition reaction.

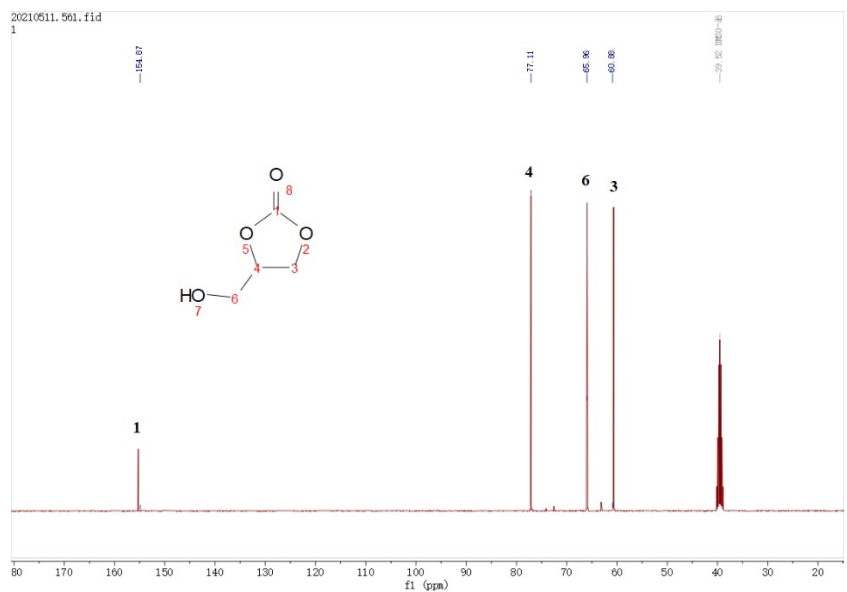

**Fig. S9.**  $^{13}\text{C}$  NMR of products after the cycloaddition reaction.

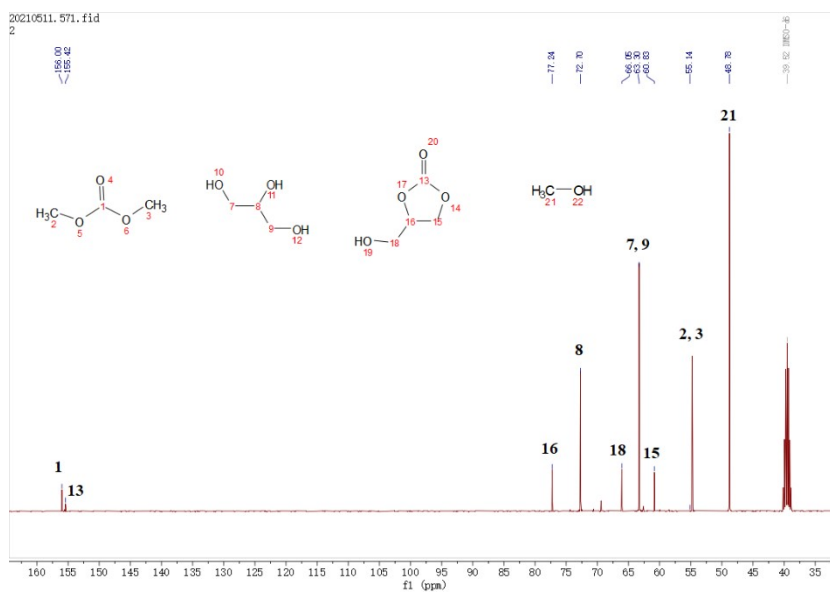

**Fig. S10.**  $^1\text{H}$  NMR of products after the transesterification reaction.

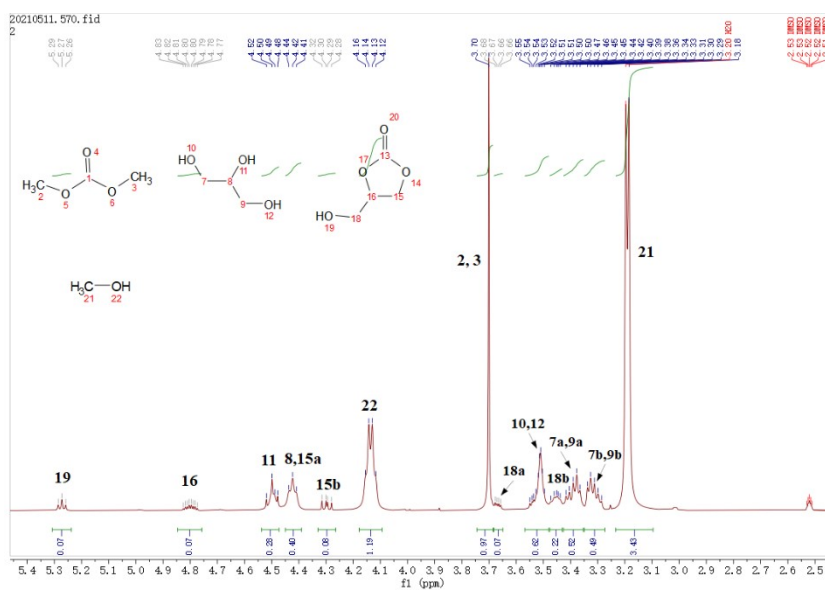

**Fig. S11.**  $^{13}\text{C}$  NMR of products after the transesterification reaction.

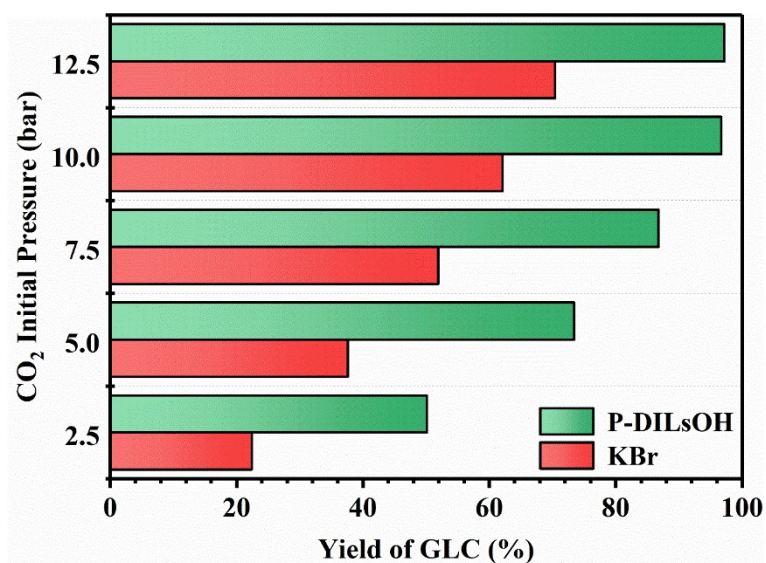

**Fig. S12.** Comparison of cycloaddition activities over P-DILsOH and KBr under different CO<sub>2</sub> pressures. Reaction conditions: GO (15 mmol), 80 °C, 1 h, catalysts (100 mg).

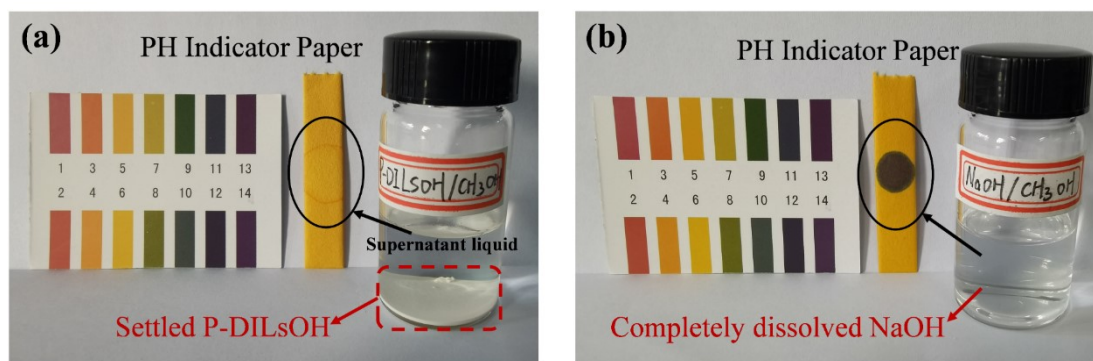

**Fig. S13.** (a) Acidity or basicity of CH<sub>3</sub>OH dispersed with P-DILsOH. (b) Acidity or basicity of CH<sub>3</sub>OH dissolved with NaOH.

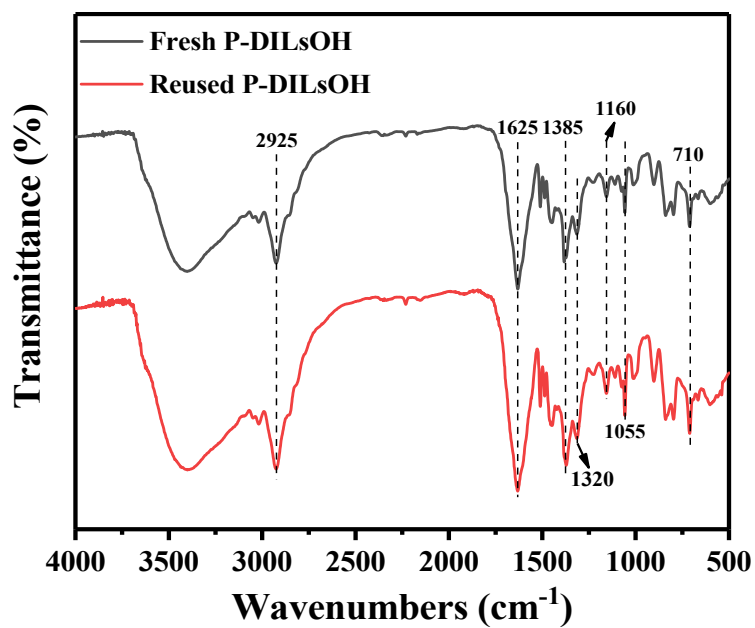

**Fig. S14.** FT-IR spectra of fresh and reused P-DILsOH.

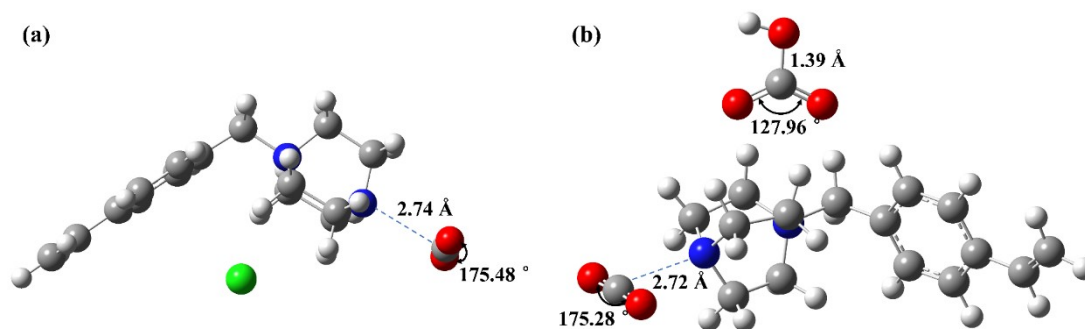

**Fig. S15.** Optimized structures of interaction between basic ILs monomers and CO<sub>2</sub>.  
 (a) [VBTEDA]Cl+CO<sub>2</sub>, (b) [VBTEDA]OH+2CO<sub>2</sub>.



**Table S1.** Textural parameters of LB-PILs.

| PILs     | $S_{\text{BET}}^{\text{a}}$ ( $\text{m}^2 \cdot \text{g}^{-1}$ ) | $V_{\text{p}}^{\text{b}}$ ( $\text{cm}^3 \cdot \text{g}^{-1}$ ) | $D_{\text{ave}}^{\text{c}}$ (nm) |
|----------|------------------------------------------------------------------|-----------------------------------------------------------------|----------------------------------|
| P-IMCCl  | 59.85                                                            | 0.1537                                                          | 10.27                            |
| P-IMCOH  | 87.51                                                            | 0.1986                                                          | 9.08                             |
| P-BCACl  | 18.48                                                            | 0.0275                                                          | 5.96                             |
| P-DILsCl | 15.68                                                            | 0.0278                                                          | 7.10                             |
| P-DILsOH | 22.58                                                            | 0.0570                                                          | 10.09                            |

<sup>a</sup> BET specific surface area. <sup>b</sup> Total pore volume. <sup>c</sup> Average pore size.

**Table S2.** Effect of CH<sub>3</sub>OH addition timing on DMC yield in two-step coupling reaction.

| Entry          | Two-step coupling reaction |               |                                   |
|----------------|----------------------------|---------------|-----------------------------------|
|                | DMC Yield (%)              | GLC Yield (%) | By-product Yield (%) <sup>c</sup> |
| 1 <sup>a</sup> | 9                          | 31            | 58                                |
| 2 <sup>b</sup> | 77                         | 20            | Trace                             |

<sup>a</sup> Reaction conditions: GO (15 mmol), CO<sub>2</sub> (10 bar) and CH<sub>3</sub>OH (225 mmol) were added into the reaction system together (140 °C, 2.5 h, 100 mg P-DILsOH).

<sup>b</sup> Reaction conditions: CO<sub>2</sub> (10 bar) cycloaddition reaction with GO (15 mmol) were carried out at 80 °C for 1 h over P-DILsOH (100 mg). And then CH<sub>3</sub>OH (225 mmol) was added into the reaction system (140 °C, 1.5 h, without CO<sub>2</sub>).

<sup>c</sup> GO was alcoholized by CH<sub>3</sub>OH.

**Table S3.** Catalytic performances about cycloaddition reaction of CO<sub>2</sub> with epoxides.

| Catalysts | PC Yield         | GLC Yield        | CEC Yield        | SC Yield         |
|-----------|------------------|------------------|------------------|------------------|
|           | (%) <sup>a</sup> | (%) <sup>a</sup> | (%) <sup>b</sup> | (%) <sup>c</sup> |
| P-IMCCl   | 59               | 68               | 60               | 57               |
| P-BCACl   | 84               | 85               | 82               | 80               |
| P-DILsCl  | 73               | 76               | 71               | 69               |
| P-DILsOH  | 96               | 97               | 94               | 92               |

<sup>a</sup> Synthetic condition: PO/GO 15 mmol, 80 °C, 10 bar CO<sub>2</sub>, 1.0 h and 100 mg P-DILsOH.

<sup>b</sup> Synthetic condition: ECH 15 mmol, 100 °C, 10 bar CO<sub>2</sub>, 1.0 h and 100 mg P-DILsOH.

<sup>c</sup> Synthetic condition: SO 15 mmol, 120 °C, 10 bar CO<sub>2</sub>, 1.5 h and 100 mg P-DILsOH.

**Table S4.** Two-step synthesis of DMC by various epoxides.

| Entry          | Epoxides | Cycloaddition reaction <sup>a</sup> |           | Transesterification reaction <sup>c</sup> |                        |
|----------------|----------|-------------------------------------|-----------|-------------------------------------------|------------------------|
|                |          | GLC                                 | GLC       | DMC                                       | By-product             |
|                |          | Sel. (%)                            | Yield (%) | Yield (%)                                 | Yield (%) <sup>d</sup> |
| 1              | PO       | 98                                  | 96        | 81                                        | Trace                  |
| 2              | GO       | 98                                  | 97        | 77                                        | Trace                  |
| 3 <sup>b</sup> | GO       | 99                                  | 10        | Trace                                     | 28                     |
| 4              | ECH      | 99                                  | 94        | 68                                        | Trace                  |
| 5              | SO       | 97                                  | 92        | 75                                        | Trace                  |

<sup>a</sup> The conditions of CO<sub>2</sub> cycloaddition reaction were consistent with those shown in Table S3.

<sup>b</sup> No catalyst was added.

<sup>c</sup> Reaction conditions: CH<sub>3</sub>OH (225 mmol), 140 °C, without CO<sub>2</sub>, 1.5 h.

<sup>d</sup> The remaining GO was alcoholized by CH<sub>3</sub>OH.

**Table S5.** Comparison of the catalytic performances of different PILs catalysts for the cycloaddition reaction of CO<sub>2</sub> and SO to SC.

| NO. | Catalyst                         | Reaction conditions                                                 | SC yield <sup>a</sup><br>(%) | Ref.      |
|-----|----------------------------------|---------------------------------------------------------------------|------------------------------|-----------|
| 1   | 3-IPMP-EtI                       | SO (30 mmol), Cat. (150 mg), 1.0 MPa, 90 °C, 5 h.                   | 88                           | 4         |
| 2   | PEAMCl                           | SO (10 mmol), Cat. (100 mg), 1.0 MPa, 120 °C, 4 h.                  | 97                           | 5         |
| 3   | IHCP-OH (0.5)                    | SO (15 mmol), Cat. (5 μmol ionic sites), 3.0 MPa, 408 K, 2 h.       | 94                           | 6         |
| 4   | PAD-3                            | SO (5 mmol), Cat. (100 mg), 1.0 MPa, 110 °C, 0.5 h.                 | 90                           | 7         |
| 5   | NHC-CAP-1 (Zn <sup>2+</sup> )    | SO (41.5 mmol), Cat. (25 mg, 1.61 wt% of Zn), 2.0 MPa, 100 °C, 3 h. | 81                           | 8         |
| 6   | P-[EEBVIM]Cl <sub>2</sub> -EGDMA | SO (5 mmol), Cat. (2 mg), 1.0 MPa, 100 °C, 96 h.                    | 95                           | 9         |
| 7   | P-DILsOH                         | SO (15 mmol), Cat. (100 mg), 1.0 MPa, 120 °C, 1.5 h.                | 92                           | This work |

<sup>a</sup> Cycloaddition activity of SO with CO<sub>2</sub> reported in the references.

**Table S6.** Comparison of the catalytic performances of different types of catalysts for two-step synthesis of carbonates.

| NO. | Catalyst                                                                          | Reaction conditions                                                                         | Carbonates yield <sup>a</sup> (%) | Ref.         |
|-----|-----------------------------------------------------------------------------------|---------------------------------------------------------------------------------------------|-----------------------------------|--------------|
| 1   | K <sub>2</sub> CO <sub>3</sub> /BrBu <sub>3</sub> PPEG<br>6000PBu <sub>3</sub> Br | Cycloaddition: PO 14.3 mmol, Cat.<br>1.1344 g, 1 MPa, 120 °C, 6 h.                          | PC: 99 %                          | 10           |
|     |                                                                                   | Transesterification: alcohol 430<br>mmol. 100 °C, 1.5 h.                                    | DMC: 99 %<br>DEC: 72 %            |              |
| 2   | MCM-41-pr-<br>TMEDA <sup>+</sup> Cl <sup>-</sup>                                  | Cycloaddition: PO 30 mmol, Cat.<br>132 mg, 2 MPa, 120 °C, 6 h.                              | PC: 99 %                          | 11           |
|     |                                                                                   | Transesterification: CH <sub>3</sub> OH 750<br>mmol. 120 °C, 4 h.                           | DMC: 68 %                         |              |
| 3   | KI/K <sub>2</sub> CO <sub>3</sub>                                                 | Cycloaddition: EO 200 mmol, Cat. I<br>3.76 mmol, Cat. II 0.9 mmol, 2.5<br>MPa, 120 °C, 1 h. | EC: 99 %                          | 12           |
|     |                                                                                   | Transesterification: CH <sub>3</sub> OH 1125<br>mmol. 60 °C, 0.5 h.                         | DMC: 82%                          |              |
| 4   | P-DVB-AEImIm                                                                      | Cycloaddition: GO 15 mmol, Cat.<br>100 mmol, 1 MPa, 80 °C, 1 h.                             | GLC: 97 %                         | This<br>work |
|     |                                                                                   | Transesterification: alcohol 225<br>mmol. 140 °C, 1.5 h.                                    | DMC: 77%<br>DEC: 73%<br>DPC: 67%  |              |

<sup>a</sup> Catalytic activity of two-step synthesis of carbonates with CO<sub>2</sub>, epoxide and alcohols as raw materials in the references.

**Table S7.** Comparison of cycloaddition activities over P-DILsOH and KBr under different reaction conditions.

| Entry          | Catalysts | Cycloaddition reaction |           |
|----------------|-----------|------------------------|-----------|
|                |           | Selectivity (%)        | Yield (%) |
| 1 <sup>a</sup> | P-DILsOH  | 98                     | 97        |
| 2 <sup>b</sup> | KBr       | 99                     | 95        |

<sup>a</sup> Reaction conditions: GO (15 mmol), 80 °C, CO<sub>2</sub> (10 bar), 1 h, P-DILsOH (100 mg).

<sup>b</sup> Reaction conditions: GO (15 mmol), 110 °C, CO<sub>2</sub> (20 bar), 2 h, KBr (100 mg).

**Table S8.** Two-step synthesis of DMC over various catalysts.

| Entry          | Catalysts | Cycloaddition reaction <sup>a</sup> |           | Transesterification reaction <sup>b</sup> |                        |
|----------------|-----------|-------------------------------------|-----------|-------------------------------------------|------------------------|
|                |           | GLC                                 | GLC       | DMC                                       | By-product             |
|                |           | Sel. (%)                            | Yield (%) | Yield (%)                                 | Yield (%) <sup>d</sup> |
| 1              | P-DILsOH  | 98                                  | 97        | 77                                        | Trace                  |
| 2              | KBr       | 99                                  | 62        | Trace                                     | 24                     |
| 3              | NaOH      | 97                                  | 71        | 56                                        | 23                     |
| 4 <sup>c</sup> | KBr/NaOH  | 98                                  | 64        | 49                                        | 30                     |

<sup>a</sup> Reaction conditions: GO (15 mmol), 80 °C, CO<sub>2</sub> (10 bar), 1 h, catalysts (100 mg).

<sup>b</sup> Reaction conditions: CH<sub>3</sub>OH (225 mmol), 140 °C, without CO<sub>2</sub>, 1.5 h.

<sup>c</sup> Binary catalysts: KBr (50 mg)/NaOH (50 mg).

<sup>d</sup> The remaining GO was alcoholized by CH<sub>3</sub>OH.

## REFERENCES

- [1] J. B. Huang, C. He, L. Q. Wu, H. Tong, *J. Energy Inst.*, 2017, **90**, 372-381.
- [2] T. Lu, F. W. Chen, *J. Comput. Chem.*, 2012, **33**, 580-592.
- [3] W. Humphrey, A. Dalke, K. Schulten, *J. Mol. Graphics*, 1996, **14**, 33-38.
- [4] W. Zhang, Y. Mei, P. Wu, H. H. Wu, M. Y. He, *Catal. Sci. Technol.*, 2019, **9**, 1030-1038.
- [5] X. C. Wang, Q. Dong, Z. Z. Xu, Y. Wu, D. M. Gao, Y. S. Xu, C. J. Ye, Y. T. Wen, A. Q. Liu, Z. Y. Long, G. J. Chen, *Chem. Eng. J.*, 2021, **403**, 126460.
- [6] D. G. Jia, L. Ma, Y. Wang, W. L. Zhang, J. Li, Y. Zhou, J. Wang, *Chem. Eng. J.*, 2020, **390**, 124652.
- [7] Z. J. Guo, X. C. Cai, J. Y. Xie, X. C. Wang, Y. Zhou, J. Wang, *ACS Appl. Mater. Interfaces*, 2016, **8**, 12812-12821.
- [8] P. Puthiaraj, S. Ravi, K. Yu, W. S. Ahn, *Appl. Catal. B: Environ.*, 2019, **251**, 195-205.
- [9] H. B. Song, Y. J. Wang, M. Xiao, L. Liu, Y. L. Liu, X. F. Liu, H. J. Gai, *ACS Sustainable Chem. Eng.*, 2019, **7**, 9489-9497.
- [10] J. S. Tian, C. X. Miao, J. Q. Wang, F. Cai, Y. Du, Y. Zhao, L. N. He, *Green Chem.*, 2007, **9**, 566-571.
- [11] J. Li, L. G. Wang, S. M. Liu, X. L. Li, F. Shi, Y. Q. Deng, *Chem. Lett.*, 2010, **39**, 1277-1278.
- [12] J. Q. Wang, J. Sun, C. Y. Shi, W. G. Cheng, X. P. Zhang, S. J. Zhang, *Green Chem.*, 2011, **13**, 3213-3217.
- [13]
